# Supplementary material for: Randomised Clinical Trial: Calorie Restriction Regimen with Tomato Juice Supplementation Ameliorates Oxidative Stress and Preserves a Proper Immune Surveillance Modulating Mitochondrial Bioenergetics of T-Lymphocytes in Obese Children Affected by Non-Alcoholic Fatty Liver Disease (NAFLD)
Source: MDPI journal article supplement (doi:10.3390/jcm9010141), 2020-01-04

Supporting information

Figure S1. CONSORT flow diagram.

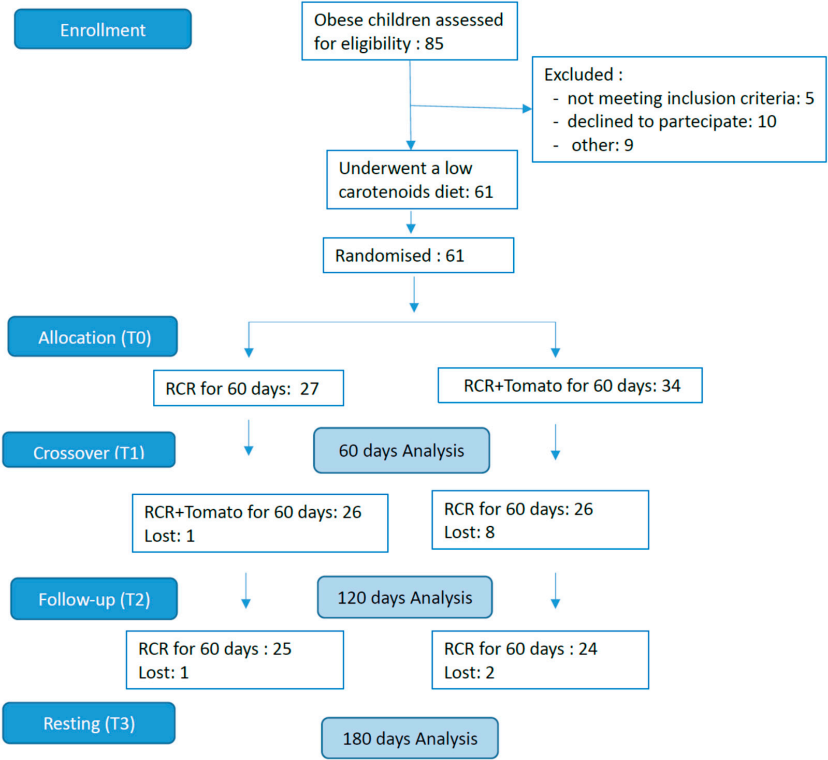

### **Serum lycopene levels determination**

200 µL of serum were mixed with 1 mL of distilled water and 1 mL of ethanol solution containing 0.01% ascorbic acid for the precipitation of protein and protection of lycopene. Two mL of hexane was added for the extraction of lycopene, and the mixture was mixed and centrifuged at 3000 rpm for 7 min, after which the hexane layer was collected and evaporated to dryness under nitrogen (for three times). The residue was dissolved in 200 µL of dichloromethane /methanol (45:55, v/v) and 10 µL were injected into an HPLC system (Agilent 1260 Infinity) equipped with autosampler. Lycopene separation was performed using an analytical column (Agilent Eclipse Plus C18 3.5 µm, 2.1 x 150 mm) maintained at room temperature without guard column. The mobile phase was composed of dichloromethane (solvent A) and methanol (solvent B) and the elution was achieved using the following conditions: (1) isocratic elution with 5% A from the injection time until 11 min, (2) a gradient from 5% A to 50% A for 1 min, (3) 50% A for 2 min, (iv) a gradient from 50% to 5% A for 1 min, (v) 5% A over 8 min (total run time 23 min). The detection wavelength was set at 476 nm, and the flow rate was 0.4 mL/min. Lycopene was quantified using a standard calibration curve ranging from 0 to 1000 ng/mL, as previously described [16]. Data are reported as average and standard deviation (SD).

### **Anthropometric measures, serum biochemical levels, ultrasound parameters and HRI at T3 phase**

In table S3 and S4 we reported the % mean change of anthropometric measures and serum biochemical parameters at 60, 120 and 180 days compared to baseline (T0). These results highlight that during the resting phase T3 (further 60 days on RCR for both groups), children from group 1 returned to the baseline body weight, while group 2 weighed 5 kg less than the baseline value. Moreover, at the end of the resting phase BMI was decreased -8.9% in children started with RCR+Tomato and -1.7% in those starting with RCR only (Table S3).

Insulin levels and HOMA-IR remained low for all time points in both groups (Table S4). Notably at T3, in group 2 total cholesterol returned to baseline values, while HDL increased in both groups at T1, T2 and T3 (Table S4).

The loss of subcutaneous and visceral fat was always higher in children of group 2, up to resting phase (T3) (Table S5). Indeed, at T3 the estimation of subcutaneous and visceral fat at xyfoid and umbilicus showed a marked decrease (about -20%) in group 2 (RCR+Tomato) and a lower decrease in group 1 (-10%). The ratio of reflectance of the liver tissue compared to the kidney cortex (Hepato-Renal Index, HRI) decreased in both groups up to the end of trial (T3) (Table S5).

Figure S2. Serum Lycopene levels determined in group 2 (RCR+Tomato).

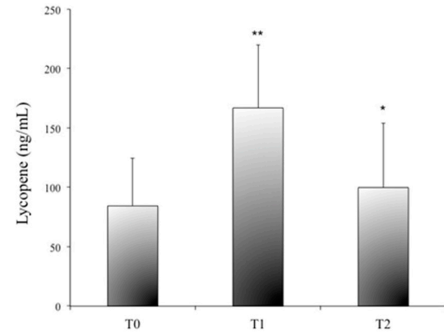

Mean serum lycopene levels (ng/mL) determined at baseline (T0), 60 days (T1) and 120 days (T2) in a random sample of 9 children. \*\* T1 versus T0,  $p = 0.005$ ; \* T2 versus T1,  $p = 0.030$  (ANOVA with Bonferroni post hoc test). Error bars correspond to standard deviations.

Table S1. Demographic characteristics of patients.

| Variable        | Group 1 (26) | Group 2 (35) |
|-----------------|--------------|--------------|
| Age             | 10.8 ± 1.9   | 10.4 ± 2.1   |
| Sex m           | 10           | 23           |
| f               | 16           | 12           |
| BMI centiles    | 94.8 ± 2.9   | 95.3 ± 2.7   |
| Height centiles | 77.9 ± 24.9  | 68.9 ± 26.1  |
| Weight centiles | 94.9 ± 3.3   | 93.9 ± 6.6   |

**Commented [M1]:** If the number has a decimal point in the middle, please change the comma to a decimal point in this image. For example, 10,8 should be changed to 10.8. Please revise the table.

Table S2. Daily energy intake and RCR composition. Group 1: RCR; Group 2: RCR+Tomato. Student's T-test.

|                         | Group | Mean   | SD     | p     |
|-------------------------|-------|--------|--------|-------|
| Energy (Kcal)           | 1     | 1175.3 | 186.9  | 0.919 |
|                         | 2     | 1180.7 | 193.8  |       |
| Proteins (g)            | 1     | 53.5   | 11.4   | 0.864 |
|                         | 2     | 53.0   | 11.7   |       |
| Total Lipids (g)        | 1     | 38.1   | 7.0    | 0.241 |
|                         | 2     | 40.7   | 8.4    |       |
| Simple sugars (g)       | 1     | 164.6  | 35.1   | 0.646 |
|                         | 2     | 160.2  | 34.6   |       |
| Olygosaccharides (g)    | 1     | 49.7   | 16.6   | 0.527 |
|                         | 2     | 46.5   | 19.6   |       |
| Insoluble Fibers (g)    | 1     | 4.2    | 2.0    | 0.036 |
|                         | 2     | 5.8    | 3.1    |       |
| Cholesterol (mg)        | 1     | 142.9  | 78.6   | 0.236 |
|                         | 2     | 168.7  | 77.1   |       |
| Saturated FA (mg)       | 1     | 9.8    | 2.5    | 0.424 |
|                         | 2     | 10.4   | 2.7    |       |
| Polyunsaturated FA (mg) | 1     | 4.6    | 0.9    | 0.550 |
|                         | 2     | 4.8    | 1.2    |       |
| Monounsaturated FA (mg) | 1     | 20.3   | 5.0    | 0.293 |
|                         | 2     | 21.7   | 4.8    |       |
| Polyphenols (mg)        | 1     | 620.2  | 299.9  | 0.160 |
|                         | 2     | 515.5  | 235.1  |       |
| Beta-Carotene (mg)      | 1     | 902.0  | 785.3  | 0.008 |
|                         | 2     | 1878.1 | 1588.0 |       |
| Alpha-Tocopherol (mg)   | 1     | 0.59   | 0.33   | 0.058 |
|                         | 2     | 0.88   | 0.65   |       |

**Commented [M2]:** If the number has a decimal point in the middle, please change the comma to a decimal point in this image. Please revise the table.

**Table S3. Body parameters (mean ±SE and % change from baseline) at baseline and after 60, 120 and 180 days.**

| Variab le    | Group | Baseline   | Treatment   | Day 60       | %mean change | Treatment   | Day 120      | % mean change | Treatme nt | Day 180 §   | % mean change |
|--------------|-------|------------|-------------|--------------|--------------|-------------|--------------|---------------|------------|-------------|---------------|
| Weight (Kg)  | 1     | 63.1 ± 3.0 | RCR         | 61.9 ± 2.9** | -1.8         | RCR+TOM ATO | 62.0 ± 3.0*  | -1.6          | RCR        | 64.4 ± 3.2  | 2.0           |
|              | 2     | 60.1 ± 2.8 | RCR+TOM ATO | 55.9 ± 2.7** | -7.0         | RCR         | 55.3 ± 3.4** | -7.9          | RCR        | 55.4 ± 3.6  | -7.8          |
| BMI          | 1     | 26.7 ± 0.7 | RCR         | 26.0 ± 0.7** | -2.7         | RCR+TOM ATO | 25.7 ± 0.8** | -3.9          | RCR        | 26.3 ± 0.7  | -1.7          |
|              | 2     | 26.6 ± 0.7 | RCR+TOM ATO | 24.7 ± 0.6** | -6.9         | RCR         | 24.2 ± 0.7** | -8.7          | RCR        | 24.2 ± 0.9  | -8.9          |
| Waist (cm)   | 1     | 83.4 ± 1.7 | RCR         | 82.5 ± 1.6*  | -1.2         | RCR+TOM ATO | 81.3 ± 1.7** | -2.6          | RCR        | 83.5 ± 1.6  | 0.0           |
|              | 2     | 83.5 ± 1.6 | RCR+TOM ATO | 79.2 ± 1.7** | -5.1         | RCR         | 78.5 ± 2.3** | -5.9          | RCR        | 78.4 ± 2.4* | -6.14         |
| Hip (cm)     | 1     | 94.1 ± 2.1 | RCR         | 93.1 ± 2.2   | -1.1         | RCR+TOM ATO | 92.2 ± 2.0*  | -2.0          | RCR        | 96.2 ± 2.2  | 2.2           |
|              | 2     | 93.2 ± 2.1 | RCR+TOM ATO | 88.7 ± 2.0** | -4.9         | RCR         | 89.0 ± 2.4** | -4.5          | RCR        | 89.5 ± 2.4  | -4.0          |
| Abdomen (cm) | 1     | 93.3 ± 2.1 | RCR         | 92.9 ± 2.3   | -0.5         | RCR+TOM ATO | 90.5 ± 2.2** | -3.0          | RCR        | 93.0 ± 2.1  | -0.3          |
|              | 2     | 90.8 ± 1.9 | RCR+TOM ATO | 86.9 ± 1.8   | -4.3         | RCR         | 86.1 ± 2.5   | -5.2          | RCR        | 85.6 ± 2.5  | -4.8          |
| % Body fat   | 1     | 21.7 ± 2.1 | RCR         | 20.7 ± 2.0** | -4.6         | RCR+TOM ATO | 19.4 ± 2.0** | -10.6         | RCR        | 20.1 ± 1.8  | -7.3          |
|              | 2     | 24.4 ± 1.6 | RCR+TOM ATO | 21.5 ± 1.6** | -11.9        | RCR         | 19.5 ± 2.3** | -20.0         | RCR        | 22.1 ± 2.6  | -9.4          |

**Commented [M3]:** If the number has a decimal point in the middle, please change the comma to a decimal point in this image. Please revise the table.

\*: p≤0.05 \*\*p≤0.01 paired Student's t-test comparing the effect of each intervention to the baseline

Table S4. Serum parameters (mean ±SE and % change from baseline) at baseline and after 60, 120 and 180 days.

| Variable                  | Group | Baseline     | Treatment  | Day 60        | %mean change | Treatment  | Day 120      | %mean change | Treatment | Day 180      | %mean change |
|---------------------------|-------|--------------|------------|---------------|--------------|------------|--------------|--------------|-----------|--------------|--------------|
| Glucose (mg/dl)           | 1     | 77.1 ± 1.2   | RCR        | 74.9 ± 1.7    | -2.8         | RCR+TOMATO | 73.2 ± 1.4   | -5.1         | RCR       | 75.0 ± 1.8   | -2.7         |
|                           | 2     | 75.7 ± 1.3   | RCR+TOMATO | 73.9 ± 1.4    | -2.5         | RCR        | 74.0 ± 1.4   | -2.3         | RCR       | 75.2 ± 1.5   | -0.7         |
| Insulin (mU/L)            | 1     | 21.0 ± 2.2   | RCR        | 17.1 ± 1.4    | -18.3        | RCR+TOMATO | 18.9 ± 1.8   | -10.2        | RCR       | 17.2 ± 2.2   | -18.1        |
|                           | 2     | 21.3 ± 2.8   | RCR+TOMATO | 14.0 ± 1.9 ** | -34.1        | RCR        | 16.7 ± 2.9   | -21.6        | RCR       | 14.8 ± 2.8   | -30.4        |
| HOMA-IR                   | 1     | 4.0 ± 0.4    | RCR        | 3.2 ± 6.3*    | -21.6        | RCR+TOMATO | 3.5 ± 0.3    | -12.8        | RCR       | 3.2 ± 0.4    | -20.6        |
|                           | 2     | 3.9 ± 6.5    | RCR+TOMATO | 2.6 ± 6.4**   | -32.9        | RCR        | 3.1 ± 0.6    | -21.0        | RCR       | 2.8 ± 0.2    | -29.1        |
| Total cholesterol (mg/dl) | 1     | 148.9 ± 5.8  | RCR        | 148.2 ± 5.4   | -0.5         | RCR+TOMATO | 147.8 ± 5.8  | -0.7         | RCR       | 154.0 ± 5.5  | 3.4          |
|                           | 2     | 152.9 ± 4.8  | RCR+TOMATO | 142.7 ± 5.5*  | -6.7**       | RCR        | 146.0 ± 7.0  | -4.5         | RCR       | 152.3 ± 8.9  | -0.4         |
| LDL cholesterol (mg/dl)   | 1     | 97.2 ± 6.3   | RCR        | 94.7 ± 5.7    | -2.5         | RCR+TOMATO | 90.6 ± 5.8   | -6.8         | RCR       | 98.0 ± 5.2   | 3.8          |
|                           | 2     | 97.3 ± 4.5   | RCR+TOMATO | 89.2 ± 4.9**  | -8.3         | RCR        | 85.9 ± 5.7** | -7.2         | RCR       | 93.9 ± 7.2   | -1.6         |
| HDL cholesterol (mg/dl)   | 1     | 41.2 ± 1.5   | RCR        | 41.3 ± 1.6    | 0.3          | RCR+TOMATO | 43.2 ± 1.7   | 4.8          | RCR       | 45.4 ± 1.8   | 10.1         |
|                           | 2     | 40.7 ± 1.2   | RCR+TOMATO | 41.0 ± 1.9    | 0.8          | RCR        | 42.3 ± 1.7   | 3.9          | RCR       | 44.3 ± 2.5** | 8.8          |
|                           | 1     | 104.2 ± 10.9 | RCR        | 98.9 ± 10.2   | -5.0         | RCR+TOMATO | 107.8 ± 14.7 | 3.4          | RCR       | 96.8 ± 10.1  | -7.5         |

**Commented [M4]:** If the number has a decimal point in the middle, please change the comma to a decimal point in this image. Please revise the table.

|                      |   |             |            |              |       |            |             |       |     |              |       |
|----------------------|---|-------------|------------|--------------|-------|------------|-------------|-------|-----|--------------|-------|
| Triglyceride (mg/dl) | 2 | 98.4 ± 7.7  | RCR+TOMATO | 80.5 ± 7.6** | -18.2 | RCR        | 89.5 ± 17.4 | -9.1  | RCR | 100.2 ± 19.2 | 1.8   |
| ALT (UI/L)           | 1 | 36.1 ± 7.4  | RCR        | 25.1 ± 2.67  | -30.4 | RCR+TOMATO | 22.5 ± 2.2  | -37.6 | RCR | 25.2 ± 2.2   | -31.5 |
|                      | 2 | 71.3 ± 10.9 | RCR+TOMATO | 48.5 ± 8.1** | -32.0 | RCR        | 42.3 ± 8.8* | -40.7 | RCR | 54.5 ± 18.6  | -23.5 |
| AST (UI/L)           | 1 | 30.5 ± 4.0  | RCR        | 22.8 ± 1.2   | -25.3 | RCR+TOMATO | 21.9 ± 1.2  | -27.9 | RCR | 23.8 ± 1.3   | -21.6 |
|                      | 2 | 44.3 ± 5.1  | RCR+TOMATO | 34.4 ± 3.9*  | -22.3 | RCR        | 31.0 ± 3.7  | -30.0 | RCR | 35.9 ± 5.9   | -18.2 |

\*: p≤0.05 \*\*p≤0.01 paired Student's t-test comparing the effect of each intervention to the baseline

**Table S5. Ultrasound parameters (mean ±SE and % change from baseline) at baseline and after 60, 120 and 180 days.**

| Variable                            | Group | Baseline    | Treatment  | Day 60      | % mean change | Treatment  | Day 120     | % mean change | Treatment | Day 180     | % mean change |
|-------------------------------------|-------|-------------|------------|-------------|---------------|------------|-------------|---------------|-----------|-------------|---------------|
| Subcutaneous fat at xyfoid level    | 1     | 15.4 ± 0.8  | RCR        | 14.5 ± 0.7  | -6.0          | RCR+TOMATO | 13.6 ± 0.7  | -11.5         | RCR       | 13.8 ± 0.6* | -10.2         |
|                                     | 2     | 13.6 ± 0.7  | RCR+TOMATO | 11.9 ± 0.7* | -12.8         | RCR        | 11.6 ± 0.8  | -15.2         | RCR       | 11.1 ± 1.1  | -18.7         |
| Visceral fat at xyfoid level        | 1     | 13.0 ± 1.1  | RCR        | 11.7 ± 0.9  | -9.9          | RCR+TOMATO | 11.8 ± 0.7* | -9.0          | RCR       | 12.8 ± 1.1  | -1.4          |
|                                     | 2     | 11.6 ± 1.1  | RCR+TOMATO | 10.6 ± 0.9  | -8.4          | RCR        | 9.7 ± 0.7   | -16.6         | RCR       | 9.3 ± 1.1   | -19.5         |
| Subcutaneous fat at umbilical level | 1     | 20.7 ± 1.6  | RCR        | 20.9 ± 1.5  | 1.0           | RCR+TOMATO | 19.7 ± 1.2  | -4.8          | RCR       | 21.2 ± 1.2  | 2.7           |
|                                     | 2     | 18.7 ± 0.9  | RCR+TOMATO | 17.7 ± 1.1  | -5.5          | RCR        | 17.0 ± 1.2  | -3.8          | RCR       | 16.6 ± 1.1  | -2.3          |
| Visceral fat at umbilical level     | 1     | 35.7 ± 2.1  | RCR        | 31.8 ± 2.0  | -11.0         | RCR+TOMATO | 33.8 ± 1.7  | -5.1          | RCR       | 33.1 ± 1.3  | -7.1          |
|                                     | 2     | 36.9 ± 2.1  | RCR+TOMATO | 33.0 ± 2.0  | -10.6         | RCR        | 31.8 ± 1.9  | -14.0         | RCR       | 33.7 ± 2.6  | -8.7          |
| Liver right lobe (mm)               | 1     | 146.0 ± 4.1 | RCR        | 147. ± 3.3  | 1.4           | RCR+TOMATO | 146.5 ± 3.0 | 0.5           | RCR       | 147.8 ± 3.1 | 1.4           |
|                                     | 2     | 151.6 ± 3.7 | RCR+TOMATO | 144.4 ± 3.9 | -4.7          | RCR        | 143.9 ± 3.0 | -3.5          | RCR       | 149.9 ± 2.9 | -1.7          |
| Liver left lobe (mm)                | 1     | 100.9 ± 3.5 | RCR        | 98.3 ± 2.7  | -2.6          | RCR+TOMATO | 99.1 ± 3.0  | -1.8          | RCR       | 97.4 ± 3.1  | -3.5          |
|                                     | 2     | 102.0 ± 3.0 | RCR+TOMATO | 97.3 ± 2.6  | -4.7          | RCR        | 98.4 ± 3.0  | -3.5          | RCR       | 100.3 ± 3.5 | -1.7          |
| Liver caudatum (mm)                 | 1     | 44.8 ± 1.8  | RCR        | 44.8 ± 1.3  | -0.2          | RCR+TOMATO | 44.8 ± 1.5  | -0.1          | RCR       | 42.7 ± 1.5  | -4.8          |
|                                     | 2     | 44.8 ± 1.6  | RCR+TOMATO | 43.9 ± 1.6  | -2.0          | RCR        | 42.4 ± 1.5  | -5.4          | RCR       | 45.4 ± 2.0  | 1.4           |
| HRI                                 | 1     | 3.2 ± 0.2   | RCR        | 2.15 ± 0.2* | -34           | RCR+TOMATO | 1.48 ± 0.1  | -54.4         | RCR       | 2.1 ± 0.2   | -35.8         |

**Commented [M5]:** If the number has a decimal point in the middle, please change the comma to a decimal point in this image. Please revise the table.



|  |   |           |                |           |     |     |      |       |     |            |       |
|--|---|-----------|----------------|-----------|-----|-----|------|-------|-----|------------|-------|
|  | 2 | 2.6 ± 0.4 | RCR+TOMAT<br>O | 1.76± 0.4 | -32 | RCR | 1.75 | -32.5 | RCR | 1.92 ± 0.2 | -25.8 |
|--|---|-----------|----------------|-----------|-----|-----|------|-------|-----|------------|-------|

---

\*:  $p \leq 0.05$  \*\* $p \leq 0.01$  paired Student's t-test comparing the effect of each intervention to the baseline

**Table S6. Absolute number and percentage of different immune cell subpopulations in peripheral blood of children at baseline and after 60 and 120 days.**

| Variable                                     | Group | Baseline   | Treatment  | Day 60     | Treatment  | Day 120    |
|----------------------------------------------|-------|------------|------------|------------|------------|------------|
| Leucocytes cells                             | 1     | 5925 ± 359 | RCR        | 5608 ± 289 | RCR+Tomato | 6352 ± 370 |
|                                              | 2     | 6075 ± 354 | RCR+Tomato | 5699 ± 273 | RCR        | 5932 ± 410 |
| Lymphocytes cells                            | 1     | 2394 ± 123 | RCR        | 2362 ± 128 | RCR+Tomato | 2520 ± 143 |
|                                              | 2     | 2855 ± 161 | RCR+Tomato | 2716 ± 132 | RCR        | 2700 ± 217 |
| CD3 <sup>+</sup> cells                       | 1     | 1608 ± 90  | RCR        | 1632 ± 99  | RCR+Tomato | 1779 ± 118 |
|                                              | 2     | 2036 ± 120 | RCR+Tomato | 1971 ± 98  | RCR        | 1955 ± 164 |
| CD4 <sup>+</sup> cells                       | 1     | 847 ± 49   | RCR        | 861 ± 55   | RCR+Tomato | 954 ± 62   |
|                                              | 2     | 1052 ± 59  | RCR+Tomato | 1018 ± 45  | RCR        | 1009 ± 78  |
| CD8 <sup>+</sup> cells                       | 1     | 578 ± 39   | RCR        | 584 ± 50   | RCR+Tomato | 636 ± 51   |
|                                              | 2     | 743 ± 64   | RCR+Tomato | 724 ± 57   | RCR        | 724 ± 68   |
| CD3 <sup>+</sup> CD45RA <sup>+</sup> cells   | 1     | 952 ± 70   | RCR        | 952 ± 70   | RCR+Tomato | 1044 ± 80  |
|                                              | 2     | 1300 ± 96  | RCR+Tomato | 1162 ± 75  | RCR        | 1182 ± 110 |
| CD3 <sup>+</sup> CD45RO <sup>+</sup> cells   | 1     | 654 ± 47   | RCR        | 677 ± 52   | RCR+Tomato | 736 ± 62   |
|                                              | 2     | 736 ± 42   | RCR+Tomato | 809 ± 51   | RCR        | 785 ± 69   |
| % CD3 <sup>+</sup> CD45RA <sup>+</sup> cells | 1     | 39 ± 2     | RCR        | 40 ± 2     | RCR+Tomato | 41 ± 2     |
|                                              | 2     | 44 ± 1     | RCR+Tomato | 43 ± 2     | RCR        | 43 ± 1     |
| % CD3 <sup>+</sup> CD45RO <sup>+</sup> cells | 1     | 28 ± 1     | RCR        | 29 ± 2     | RCR+Tomato | 29 ± 2     |
|                                              | 2     | 27 ± 1     | RCR+Tomato | 30 ± 1     | RCR        | 29 ± 1     |
| CD4 <sup>+</sup> CD45RA <sup>+</sup> cells   | 1     | 454 ± 41   | RCR        | 479 ± 40   | RCR+Tomato | 510 ± 40   |
|                                              | 2     | 652 ± 48   | RCR+Tomato | 593 ± 40   | RCR        | 619 ± 64   |
| CD4 <sup>+</sup> CD45RO <sup>+</sup> cells   | 1     | 394 ± 22   | RCR        | 383 ± 32   | RCR+Tomato | 444 ± 41   |
|                                              | 2     | 400 ± 22   | RCR+Tomato | 425 ± 24   | RCR        | 389 ± 23   |
| % CD4 <sup>+</sup> CD45RA <sup>+</sup> cells | 1     | 19 ± 1     | RCR        | 20 ± 1     | RCR+Tomato | 20 ± 1     |
|                                              | 2     | 23 ± 1     | RCR+Tomato | 22 ± 1     | RCR        | 22.48 ± 1  |
| % CD4 <sup>+</sup> CD45RO <sup>+</sup> cells | 1     | 17 ± 1     | RCR        | 16 ± 1     | RCR+Tomato | 17.5 ± 1   |
|                                              | 2     | 15 ± 1     | RCR+Tomato | 16 ± 1     | RCR        | 15.32 ± 1  |
| % CD4 <sup>+</sup> Foxp3 <sup>+</sup> cells  | 1     | 4 ± 0      | RCR        | 4.8 ± 0    | RCR+Tomato | 4.29 ± 0.4 |

**Commented [M6]:** If the number has a decimal point in the middle, please change the comma to a decimal point in this image. Please revise the table.

|                               |   |              |            |              |            |              |
|-------------------------------|---|--------------|------------|--------------|------------|--------------|
|                               | 2 | 5 ± 0        | RCR+Tomato | 4.9 ± 0      | RCR        | 5.38 ± 0.2   |
| T cell anti-CD3 proliferation | 1 | 64196 ± 6264 | RCR        | 56966 ± 6878 | RCR+Tomato | 66448 ± 8227 |
|                               | 2 | 60149 ± 6343 | RCR+Tomato | 62567 ± 5162 | RCR        | 48378 ± 4370 |

Figure S3 Metabolic parameters of PBMCs isolated from children at 60 and 120 days compared to baseline (T0) upon 12h OKT3 stimulation. White = RCR, Red = RCR+T; \*p<0.05, \*\*p<0.01 paired Student's-t-test comparing the effect of each intervention to the baseline.

Commented [M7]: Please explain the meaning of “\*” in the Supplementary Fig. 3.

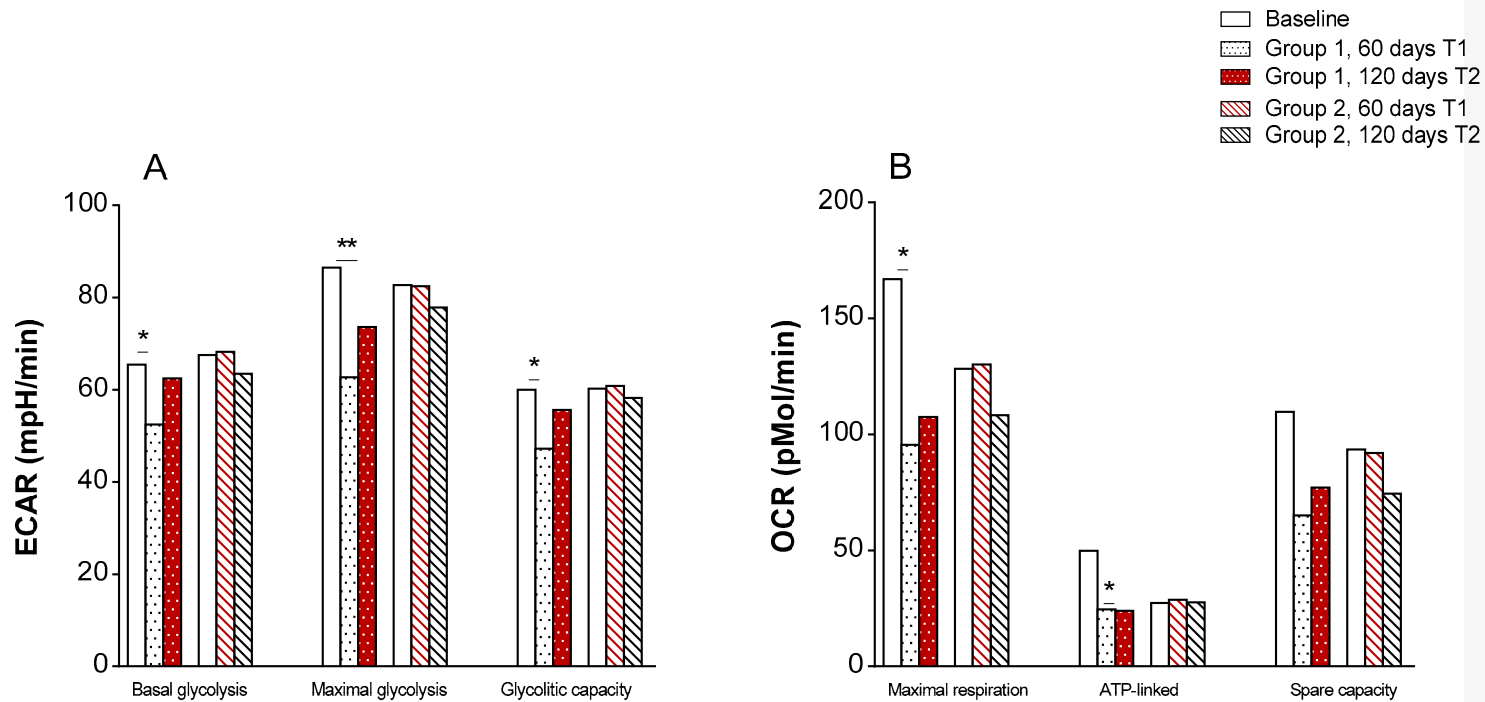

A. Glycolytic T cell metabolism after 60 and 120 days of treatment. Lower basal, maximal and glycolytic capacity from baseline was observed in children on RCR-only, whereas any change was observed in in children on RCR+Tomato. B. Together with a reduction of glycolytic

capacity, an impairment of oxidative metabolism was observed in children on RCR-only. Also children who started with RCR+Tomato, decreased their ECAR and OCR when switched to RCR-only.

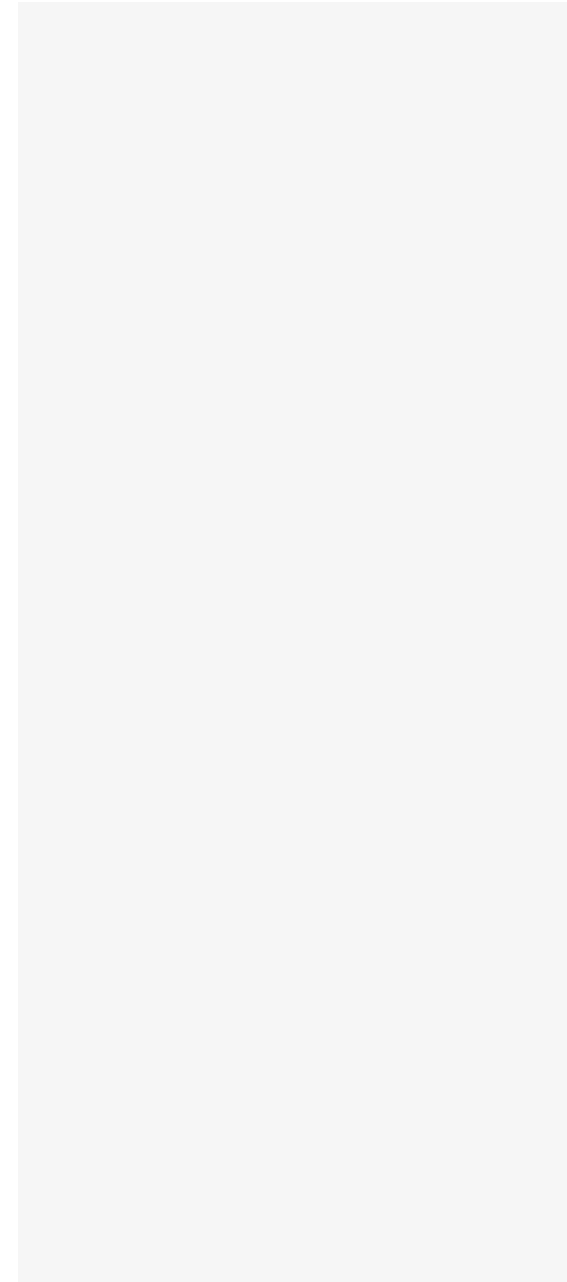

Supplement: s1 [file s1]
